# Supplementary material for: Structures of HIV-1 RT-RNA/DNA ternary complexes with dATP and nevirapine reveal conformational flexibility of RNA/DNA: insights into requirements for RNase H cleavage
Source: PubMed Central journal article supplement (PMC4081091; doi:10.1093/nar/gku487), 2014-05-31
Supplement: supp_gku487_nar-00637-m-2014-File007.pdf [file supp_gku487_nar-00637-m-2014-File007.pdf]

## **SUPPLEMENTARY INFORMATION**

**Structures of HIV-1 RT-RNA/DNA ternary complexes with dATP and nevirapine reveal conformational flexibility of RNA/DNA: insights into requirements for RNase H cleavage**

**Kalyan Das, Sergio E Martinez, Rajiv P Bandwar, and Eddy Arnold**

Center for Advanced Biotechnology and Medicine, Department of Chemistry and Chemical Biology, Rutgers University, Piscataway, New Jersey 08854, USA.

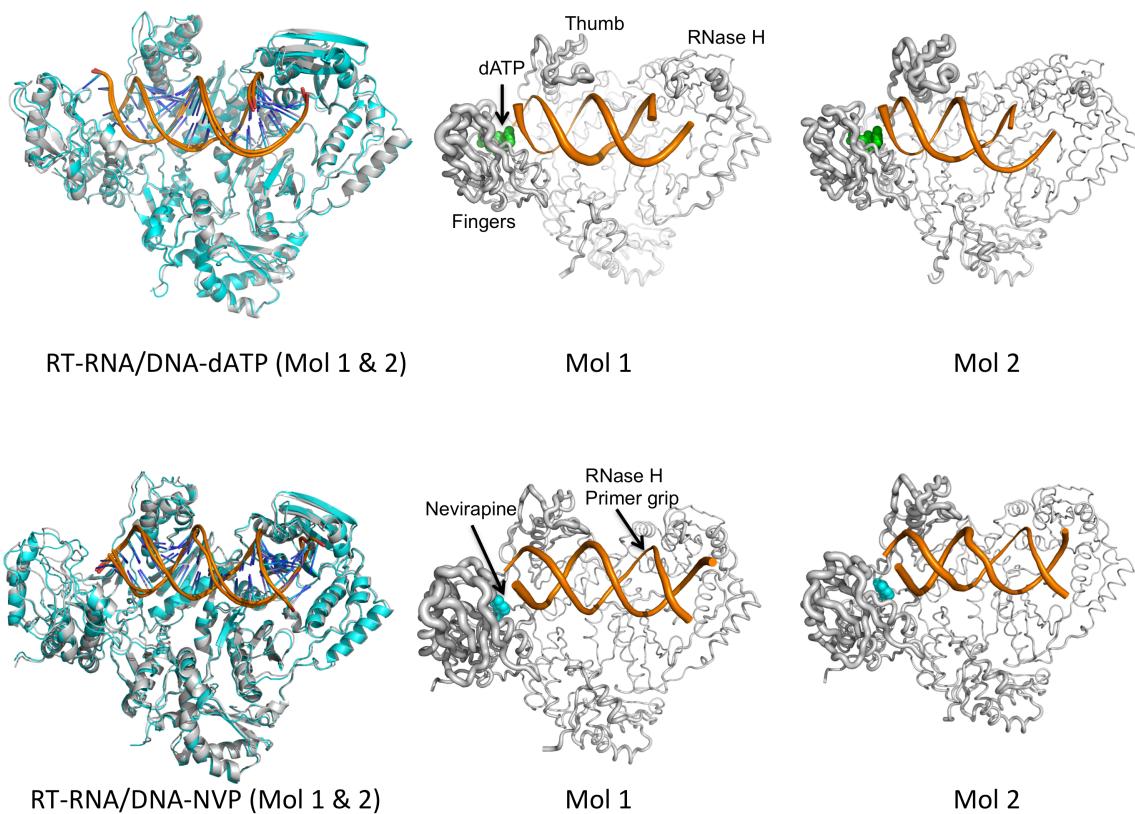

**SI Figure 1.** Comparison of two copies (Mol-1 and Mol-2) of RT-RNA/DNA-dATP (top) and RT-RNA/DNA-NVP (bottom) complexes in the respective crystallographic asymmetric units. The left figure shows an overall superposition, and the two right figures are plotted based on B-factors of individual residues/nucleotides. Tube thickness is a function of B-factor magnitude: thicker tube represents regions with higher B-factors, i.e., higher flexibility.

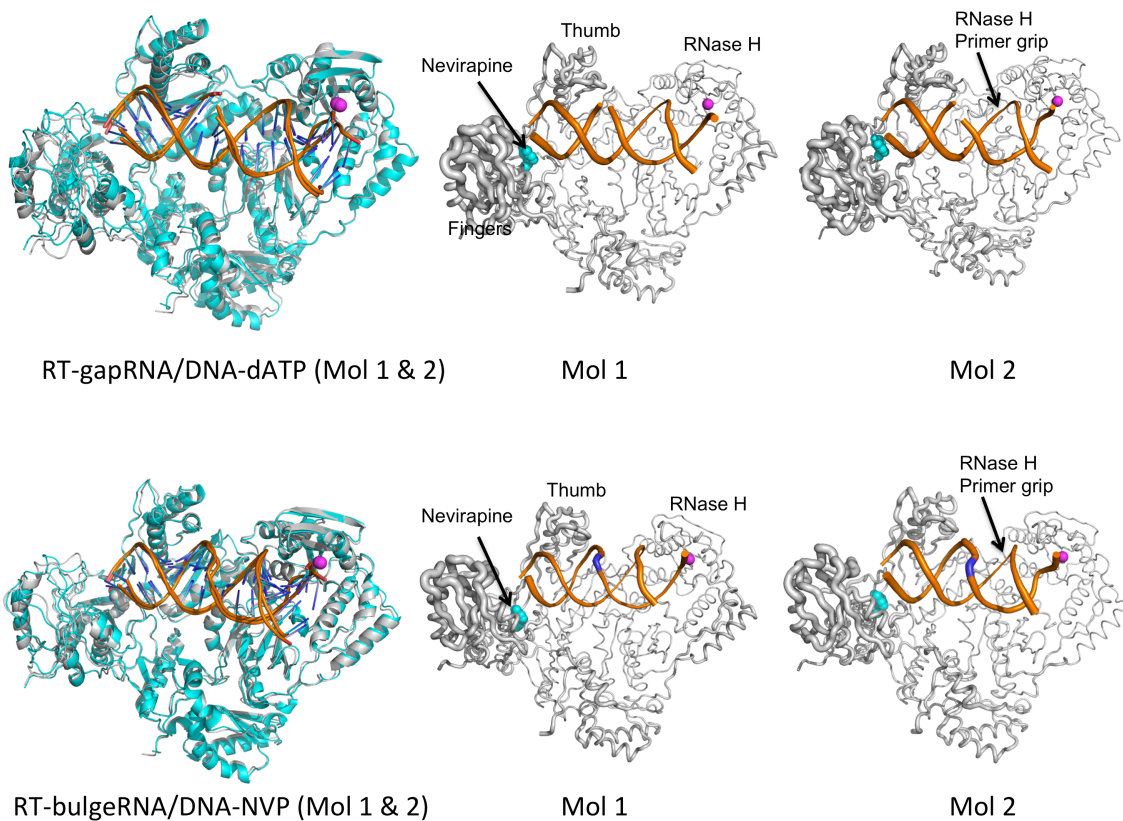

**SI Figure 2.** Comparison of two copies (Mol-1 and Mol-2) of RT-gapRNA/DNA-NVP (top) and RT-bulgeRNA/DNA-NVP (bottom) complexes in the respective crystallographic asymmetric units. The left figure shows an overall superposition, and the two right figures are plotted based on B-factors of individual residues/nucleotides. Thicker tube represents regions with higher B-factors, i.e., higher flexibility. Observed metal ions ( $Mn^{2+}$  or  $Ca^{2+}$ ) are shown as magenta spheres.

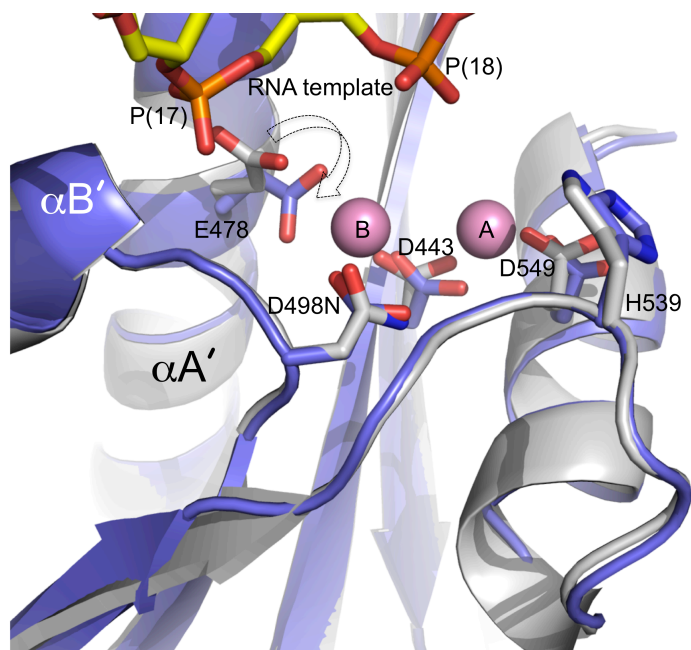

**SI Figure 3. Putative structural requirements for chelation of RNA template of an RNA/DNA substrate at the RNase H active site.** Superposition of RNase H domains of RT-bulgeRNA/DNA-NVP (protein, gray; template RNA, yellow) and RT-β-thujaplicinol structure (PDB ID 3IG1; blue) (24). The metal ions at the RNase H active site are positioned based on 3IG1 structure. The (i) D498N mutation and (ii) different rotameric conformation of E478 might restrict the binding of metal ion B and chelation of the RNA template in the RT-bulgeRNA/DNA-NVP structure.



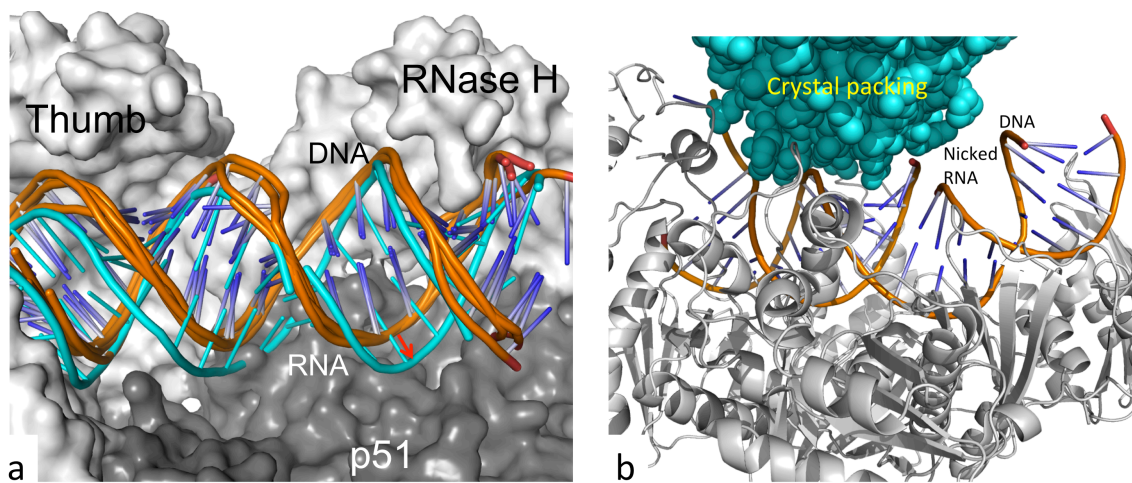

**SI Figure 4. A nicked RNA/DNA in RT-RNA/DNA-efavirenz complex (PDB ID 4B30) (33), that has a different track approaching the RNase H domain, has extensive contacts with an adjacent RT molecule in the crystal. (a)** Superposition of RT-nicked RNA/DNA-efavirenz (PDB ID 4B30; cyan RNA/DNA) onto an array of structures of RT-RNA/DNA-NVP complexes, discussed in the paper. The structures were aligned by C $\alpha$  superposition of RNase H domains (residues 440 to 550). The red arrow indicates the displacement of the RNA strand in the 4B30 structure approaching the RNase H domain compared to other RT-RNA/DNA-NNRTI structures. **(b)** A symmetry-related RT molecule (cyan CPK model) has extensive interactions with the nicked\_RNA/DNA in the 4B30 structure (33). This crystal packing interaction may contribute significantly to the difference in the RNA track, as shown in panel **a**.

**SI Table 1.** Average inter-base-pair parameters for RT-bound DNA/DNA (D/D) and RNA/DNA (R/D) in crystal structures calculated by CURVES+ (53). The structures of RT-DNA/DNA-AZTTP (or NVP) and RT-RNA/DNA-dATP (or NVP) are used in the calculations, and the parameters for DNA/DNA structures are shaded.

| Structure            | PDB ID | Shift | Slide | Rise | Tilt | Roll | Twist | H-rise | H-twist |
|----------------------|--------|-------|-------|------|------|------|-------|--------|---------|
| RT-D/D-AZTTP (Mol 1) | 3V4I   | -0.08 | -0.28 | 3.36 | -0.1 | 6.3  | 34.0  | 3.16   | 34.9    |
| RT-D/D-AZTTP (Mol 2) | 3V4I   | -0.06 | -0.24 | 3.33 | -0.3 | 6.4  | 33.6  | 3.13   | 34.6    |
| RT-R/D-dATP (Mol 1)  | 4PQU   | 0.03  | -1.46 | 3.27 | 0.7  | 5.8  | 31.4  | 2.96   | 32.2    |
| RT-R/D-dATP (Mol 2)  | 4PQU   | 0.01  | -1.49 | 3.26 | 0.7  | 6.4  | 31.0  | 2.91   | 32.0    |
| RT-D/D-NVP (Mol 1)   | 3V81   | -0.16 | -0.55 | 3.32 | 0.0  | 5.2  | 31.6  | 3.14   | 32.3    |
| RT-D/D-NVP (Mol 2)   | 3V81   | -0.15 | -0.57 | 3.30 | 0.1  | 5.4  | 32.1  | 3.12   | 32.8    |
| RT-R/D-NVP (Mol 1)   | 4PUO   | 0.21  | -1.38 | 3.43 | 3.1  | 4.1  | 32.9  | 3.21   | 33.9    |
| RT-R/D-NVP (Mol 2)   | 4PUO   | 0.25  | -1.11 | 3.47 | 3.1  | 6.9  | 33.7  | 3.11   | 35.1    |
